# Supplementary material
Source: PubMed Central journal article supplement (PMC8272676)
Supplement: NIHMS1716825-supplement-Supplementary_materials.pdf [file NIHMS1716825-supplement-Supplementary_materials.pdf]

# Improving cancer immunotherapy using nanomedicines: progress, opportunities and challenges

---

*John D. Martin, Horacio Cabral, Triantafyllos Stylianopoulos and Rakesh K. Jain*

<https://doi.org/10.1038/s41571-019-0308-z>

# **Improving cancer immunotherapy using nanomedicine: Progress, opportunities and challenges**

John D. Martin, Horacio Cabral, Triantafyllos Stylianopoulos and Rakesh K. Jain

<https://doi.org/>

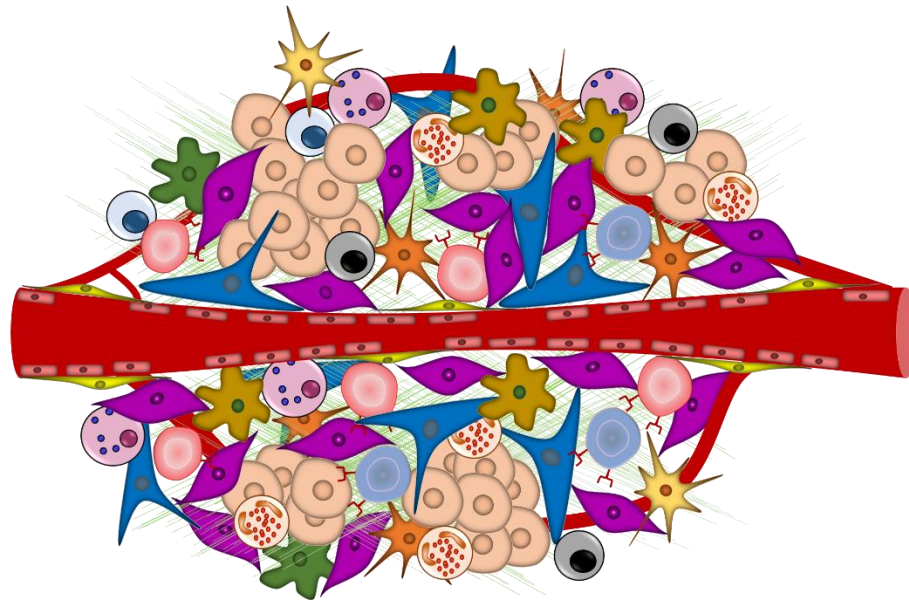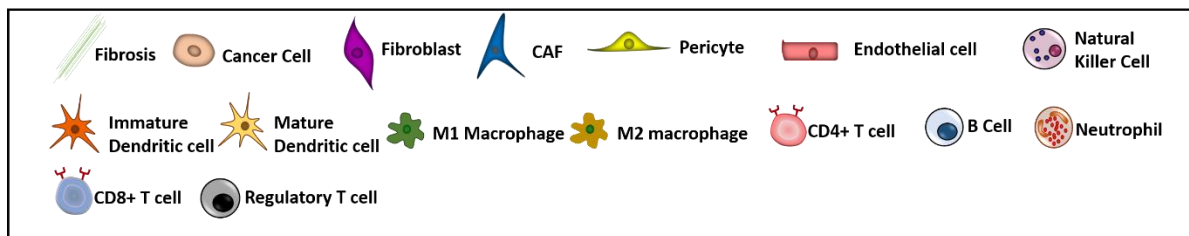

**Supplementary Figure 1. Schematic representation of cancer cells and various components of the tumor microenvironment (TME).** The TME includes various stromal cells and immune cells, extracellular matrix (ECM) and blood vessels. Note that tumor vessels are leaky and compressed in places with uneven diameter and abnormal pericyte and basement membrane coverage. These characteristics impair blood flow. Moreover, the ECM hinders the penetration of drugs, especially of large MW. Endothelial cells line the vessel wall. Pericytes and basement membrane surround endothelial cells and support their structure and function. Fibroblasts produce and maintain the extracellular matrix. Once activated, these carcinoma-associated fibroblasts (CAFs) produce excessive ECM and various cytokines. The myeloid compartment, including neutrophils, is responsible for antigen capture for degradation and presentation (dendritic cells), tissue repair (macrophages), and effector functions. These various phenotypes underscore the plasticity of these cells' phenotype, which can be altered by the TME. The lymphoid compartment is made of natural killer (NK) cells, NK T cells, B cells, CD8+ T cells and other T cells (not shown) including CD4+ T cells. CD8+ T cells are the major anti-tumor effector cells from which cytotoxic T lymphocytes (CTLs) arise and destroy cancer cells presenting a specific peptide-MHC complex. NK cells depend on expression of MHC class I molecules and B cells on surface proteins. Naïve CD8+ T cells become CTLs in lymphoid organs when they are presented an antigen. CD4+ cells can become anti-tumor helper cells that support CTL function or regulatory T cells that support the tumor. Tumors with more CD8+ T cells are considered hot and have better responses to immunotherapies.

**Supplementary Table 1. FDA-approved intravenously administered cancer nanomedicines and their survival benefit.** This table is updated from a previous review by the senior author (1).

| Trade name and cancer type (patient number)                 | Year approved | Additional drugs in investigated regimen | Control regimen                             | Change in OS                            |
|-------------------------------------------------------------|---------------|------------------------------------------|---------------------------------------------|-----------------------------------------|
| <i>PEGylated liposomal doxorubicin</i>                      |               |                                          |                                             |                                         |
| Karposi sarcoma (n = 258)(2)                                | 1995          | NA                                       | Doxorubicin, bleomycin, and vincristine     | NS                                      |
| Recurrent epithelial ovarian carcinoma (n = 474) (3)        | 2005          | NA                                       | Topotecan                                   | NS                                      |
| Metastatic breast cancer (n = 509)(4)                       | NA            | NA                                       | Doxorubicin                                 | NS                                      |
| Multiple myeloma (n = 646) (4)                              | 2008          | Bortezomib                               | Bortezomib                                  | Time to progression enhanced 2.8 months |
| <i>Nanoparticle albumin-bound paclitaxel</i>                |               |                                          |                                             |                                         |
| Metastatic breast cancer (n = 460)(5)                       | 2005          | NA                                       | Paclitaxel                                  | 2.5 months                              |
| Metastatic breast cancer (n = 302) (6)                      | NA            | NA                                       | Docetaxel                                   | 5.4 months progression-free survival    |
| Metastatic or locally recurrent breast cancer (n = 783) (7) | NA            | NA                                       | Paclitaxel                                  | NS and more toxic                       |
| Neoadjuvant breast cancer (n = 1,229) (8)                   | NA            | Epirubicin and cyclophosphamide          | Paclitaxel, epirubicin and cyclophosphamide | 9.4% increased rate of pCR              |
| Neoadjuvant breast cancer (n = 695) (9)                     | NA            | Anthracycline                            | Paclitaxel and anthracycline                | NS                                      |
| Advanced-stage NSCLC (n = 1,052)(10)                        | 2012          | Carboplatin                              | Paclitaxel, carboplatin                     | NS                                      |
| Metastatic PDAC (n = 886) (11)                              | 2013          | Gemcitabine                              | Gemcitabine                                 | 1.8 months progression-free survival    |

|                                                                                                                 |      |                                                                                   |                                              |                                                                                             |
|-----------------------------------------------------------------------------------------------------------------|------|-----------------------------------------------------------------------------------|----------------------------------------------|---------------------------------------------------------------------------------------------|
| Adjuvant PDAC (n = 866) (12)                                                                                    | NA   | Gemcitabine                                                                       | Gemcitabine                                  | NS                                                                                          |
| Metastatic non-squamous NSCLC (n = 1,202) (13)                                                                  | 2018 | Atezolizumab and/or bevacizumab with carboplatin and paclitaxel or nab-paclitaxel | Carboplatin and paclitaxel or nab-paclitaxel | Survival benefit from atezolizumab and bevacizumab. Paclitaxel equivalent to nab-paclitaxel |
| Advanced-stage TNBC (n = 902) (14)                                                                              | 2019 | Atezolizumab                                                                      | Nab-paclitaxel alone                         | Survival benefit from addition of atezolizumab                                              |
| <i>Liposomal daunorubicin</i>                                                                                   |      |                                                                                   |                                              |                                                                                             |
| Karposi sarcoma                                                                                                 | 1996 | NA                                                                                | Doxorubicin, bleomycin, and vincristine      | NS                                                                                          |
| <i>Liposomal irinotecan</i>                                                                                     |      |                                                                                   |                                              |                                                                                             |
| Second-line metastatic PDAC (n=266)(15)                                                                         | 2015 | 5-Fluorouracil and folinic acid                                                   | 5-Fluorouracil and folinic acid              | 1.9 months                                                                                  |
| <i>Liposomal vincristine</i>                                                                                    |      |                                                                                   |                                              |                                                                                             |
| ALL                                                                                                             | 2012 | NA                                                                                | NA                                           | 20% complete response                                                                       |
| Aqueous suspension of crystalline hafnium oxide nanoparticles *                                                 |      |                                                                                   |                                              |                                                                                             |
| Locally advanced soft-tissue sarcoma (n = 179) (16)                                                             | 2019 | Radiotherapy                                                                      | Radiotherapy                                 | Doubled rate of pathological complete response                                              |
| <i>Liposome-encapsulated combination of daunorubicin and cytarabine</i>                                         |      |                                                                                   |                                              |                                                                                             |
| Newly-diagnosed therapy-related AML (t-AML) or AML with myelodysplasia-related changes (AML-MRC) (n = 309) (17) | 2017 | Liposome-encapsulated combination of daunorubicin and cytarabine                  | Daunorubicin and cytarabine (7 + 3)          | 3.7 months                                                                                  |

ALL, acute lymphocytic leukaemia; AML, Acute myeloid leukaemia; NA, not applicable; NS, not significant; NSCLC, non-small-cell lung cancer; PDAC, pancreatic ductal adenocarcinoma.  
 \*This formulation has received European market approval but not FDA approval

Supplementary Table 2. FDA-approved vascular normalization agents plus agents in clinical trials in combination with nanomedicines and/or immunotherapy.

| Drug         | Target                                  | Approved indications           | Clinical trials with ICBs                                                                                                                                                                                                                                                                                                                                                                                                                                                | Clinical trials with nanomedicines                                                                                                                 |
|--------------|-----------------------------------------|--------------------------------|--------------------------------------------------------------------------------------------------------------------------------------------------------------------------------------------------------------------------------------------------------------------------------------------------------------------------------------------------------------------------------------------------------------------------------------------------------------------------|----------------------------------------------------------------------------------------------------------------------------------------------------|
| Axitinib     | VEGFR 1–3, PDGFR $\beta$                | RCC                            | Approved for: first-line treatment of patients with advanced-stage renal cell carcinoma with either avelumab or pembrolizumab. NCT02684006, NCT02853331 (both RCC)                                                                                                                                                                                                                                                                                                       | None                                                                                                                                               |
| Bevacizumab  | Anti-VEGF-A antibody                    | CRC, NSCLC, breast cancer, RCC | Approved for : first-line treatment of patients with metastatic non-squamous, NSCLC<br>NCT03038100, NCT03737643, NCT02891824, NCT03642132, NCT03353831, NCT03740165, NCT03598270 (ovarian cancer); NCT03414983, NCT02997228, NCT02563002 (CRC or CRC with MMR deficiency); NCT02366143, NCT03117049 (NSCLC); NCT03635567, NCT03556839 (cervical cancer); NCT03778957, NCT03434379 (HCC); NCT02839707 (endometrial cancer); NCT02017717 (glioblastoma); NCT02420821 (RCC) | Multiple phase III trials including NCT02839707 in ovarian cancer with liposomal doxorubicin and atezolizumab and NCT00785291 with nab-paclitaxel. |
| Cabozantinib | VEGFR 2, Tie2                           | MTC, RCC                       | None                                                                                                                                                                                                                                                                                                                                                                                                                                                                     | None                                                                                                                                               |
| Everolimus   | mTOR inhibitor                          | RCC, PNET, GI cancer, NSCLC    | NCT01668784, NCT02811861 (RCC)                                                                                                                                                                                                                                                                                                                                                                                                                                           | None                                                                                                                                               |
| Lenalidomide | Chemotherapy pleiotropic                | Multiple myeloma               | NCT02579863                                                                                                                                                                                                                                                                                                                                                                                                                                                              | None                                                                                                                                               |
| Levatinib    | VEGFR 1–3, PDGFR $\alpha$ , FGFR 1–4    | Thyroid cancer                 | None                                                                                                                                                                                                                                                                                                                                                                                                                                                                     | None                                                                                                                                               |
| Nintedanib   | VEGFR 2, PDGFR- $\alpha/\beta$ , FGFR 1 | NSCLC                          | None                                                                                                                                                                                                                                                                                                                                                                                                                                                                     | None                                                                                                                                               |
| Pazopanib    | VEGFR 1–3, PDGFR $\beta$ , FGFR 1–2     | RCC, soft tissue sarcoma       | NCT03260894 (RCC)                                                                                                                                                                                                                                                                                                                                                                                                                                                        | None                                                                                                                                               |
| Ramucirumab  | Anti-VEGFR2 antibody                    | Gastric cancer, HCC NSCLC, CRC | None                                                                                                                                                                                                                                                                                                                                                                                                                                                                     | None                                                                                                                                               |
| Regorafenib  | VEGFR 1–3, PDGFR $\beta$ , FGFR 1–2     | CRC                            | None                                                                                                                                                                                                                                                                                                                                                                                                                                                                     | None                                                                                                                                               |
| Sorafenib    | VEGFR 2,                                | RCC, HCC,                      | NCT03755791, NCT03434379,                                                                                                                                                                                                                                                                                                                                                                                                                                                | None                                                                                                                                               |

|             |                                              |                  |                                                                                                              |      |
|-------------|----------------------------------------------|------------------|--------------------------------------------------------------------------------------------------------------|------|
|             | PDGFR $\beta$                                | thyroid cancer   | NCT02576509, NCT03298451 (HCC)                                                                               |      |
| Sunitinib   | VEGFR 1–2, PDGFR $\alpha/\beta$              | RCC, GIST, PNET  | NCT02684006, NCT03729245, NCT02231749, NCT02420821, NCT03141177, NCT02853331, NCT03260894, NCT02811861 (RCC) | None |
| Thalidomide | Chemotherapy pleiotropic                     | Multiple myeloma | NCT02576977, NCT02726581 (Multiple myeloma)                                                                  | None |
| Vandetanib  | VEGFR 2                                      | MTC              | None                                                                                                         | None |
| Aflibercept | VEGF-inhibitory protein (VEGFA, VEGFB, PIGF) | CRC              | None                                                                                                         | None |

CRC, colorectal cancer; GIST, gastro-intestinal stromal tumour; HCC, hepatocellular carcinoma; MTC, medullary thyroid cancer; NSCLC, non-small-cell lung cancer; PNET, primitive neuro-ectodermal tumours. On April 22, 2019 we searched clinicaltrials.gov for the [name of anti-angiogenic therapy] AND pembrolizumab OR atezolizumab OR nivolumab OR cemiplimab OR ipilimumab OR durvalumab OR avelumab OR ipilimumab AND Cancer [DISEASE] with filters for Phase III and active or recruiting. For trials in combination with NM, on April 22, 2019 we searched clinicaltrials.gov for the [name of stromal normalizing therapy] AND (nab-paclitaxel OR (liposomal AND doxorubicin)) AND Cancer [DISEASE] with filters for Phase III and active or recruiting.

Supplementary table 3. Investigational stromal normalization agents in clinical trials involving nanomedicines and/or immune-checkpoint inhibition.

| <b>Drug name/class, target</b>                                | <b>FDA approved for cancer/other indications</b> | <b>Clinical stage for cancer with chemotherapy</b>                                                                                       | <b>Clinical stage with immunotherapy</b>                                                                                                                                                             | <b>Clinical stage with nanomedicine</b>                                                                                 |
|---------------------------------------------------------------|--------------------------------------------------|------------------------------------------------------------------------------------------------------------------------------------------|------------------------------------------------------------------------------------------------------------------------------------------------------------------------------------------------------|-------------------------------------------------------------------------------------------------------------------------|
| Losartan, an angiotensin system inhibitor also targeting TGFβ | No/yes                                           | Phase II completed – historically high resection rates in patients with locally advanced PDAC(18)                                        | NCT03563248; an ongoing phase II trial – in combination with nivolumab, radiotherapy and FOLFIRINOX in patients with PDAC                                                                            | None                                                                                                                    |
| Paricalcitol, a vitamin D receptor agonist                    | No/yes                                           | Phase II ongoing – in combination with nab-paclitaxel and gemcitabine in metastatic PDAC                                                 | NCT02930902; phase II ongoing – in combination with pembrolizumab and chemotherapy in resectable (NCT02930902, NCT03519308) or metastatic (NCT02754726) PDAC or as maintenance therapy (NCT03331562) | NCT0352079; phase II in metastatic PDAC with gemcitabine and nab-paclitaxel                                             |
| Plerixafor and immunostimulant via CXCL12 and CXCR4           | Yes/yes                                          | Phase I completed – in combination with bevacizumab in GBM(19); phase II ongoing – in combination with temozolomide and radiation in GBM | Phase I and observational studies in patients with PDAC, ovarian cancer and colorectal cancer (none active or recruiting)                                                                            | None                                                                                                                    |
| Metformin a biguanide used in diabetes that also targets TGFβ | No/yes                                           | Phase III ongoing – in combination with paclitaxel and carboplatin in endometrial cancer                                                 | Phase II ongoing in combination with nivolumab in NSCLC (NCT03048500) and CRC (NCT03800602), pembrolizumab in melanoma (NCT03311308), durvalumab in HNSCC                                            | Several, including NCT02488564 , a phase II trial in advanced HER2+ breast cancer with doxil and NCT02336087 phase I in |



|                                                                                                           |                                                          |                                                                                    |                                                                                                                                                                                                                                                       |                                                                                                                                                                                    |
|-----------------------------------------------------------------------------------------------------------|----------------------------------------------------------|------------------------------------------------------------------------------------|-------------------------------------------------------------------------------------------------------------------------------------------------------------------------------------------------------------------------------------------------------|------------------------------------------------------------------------------------------------------------------------------------------------------------------------------------|
|                                                                                                           |                                                          |                                                                                    | (NCT03618654), and in breast cancer (NCT01042379)                                                                                                                                                                                                     | unresectable PDAC with nab-paclitaxel and gemcitabine                                                                                                                              |
| All-trans retinoic acid                                                                                   | Yes/yes                                                  | Approved for acute promyelocytic leukaemia                                         | Phase II ongoing in melanoma in combination with pembrolizumab (NCT03200847) and ipilimumab (NCT02403778)                                                                                                                                             | NCT0330714; phase I in patients with locally advanced or metastatic PDAC                                                                                                           |
| PEGPH20, a pegylated recombinant hyaluronidase*                                                           | No/no                                                    | In phase I/II, PEGPH20 associated with worse survival with FOLFIRINOX in mPDAC(20) | Early phase I trial with avelumab in chemoresistant locally advanced (NCT03481920) or metastatic PDAC (NCT03193190), with pembrolizumab in NSCLC and gastric cancer (NCT02563548, NCT03281369), with atezolizumab in cholangiocarcinoma (NCT03267940) | NCT0271580; phase III trial in stage IV PDAC first-line with gemcitabine and nab-paclitaxel in patients with high tumour hyaluronan levels, based on positive phase II results(21) |
| Pentoxifylline, a non-selective phosphodiesterase inhibitor                                               | No/yes                                                   | Phase II                                                                           | None                                                                                                                                                                                                                                                  | None                                                                                                                                                                               |
| Pirfenidone, an anti-inflammatory agent approved for idiopathic pulmonary fibrosis that also targets TGFβ | No/yes                                                   | Phase I ongoing in NSCLC                                                           | None                                                                                                                                                                                                                                                  | None                                                                                                                                                                               |
| Tranilast an anti-histamine that also targets TGFβ                                                        | No/no (approved as an anti-histamine in Japan and Korea) | None                                                                               | None                                                                                                                                                                                                                                                  | None                                                                                                                                                                               |

CRC, colorectal cancer; FOLFIRINOX; folinic acid, 5-fluorouracil, irinotecan, oxaliplatin; GBM, glioblastoma; HNSCC, head and neck squamous cell carcinoma; NSCLC, non-small-cell lung cancer; PDAC, pancreatic ductal adenocarcinoma;

\*PEGPH20 does not reprogram CAFs, but rather depletes desmoplasia, which has been shown in preclinical studies to induce tumor progression. \*\*Some studies have demonstrated a correlation between relaxin levels and tumour progression. For trials involving combination with ICI, on April 22, 2019 we searched [clinicaltrials.gov](http://clinicaltrials.gov) for the [name of stromal normalizing therapy] AND pembrolizumab OR atezolizumab OR nivolumab OR cemiplimab OR ipilimumab OR

durvalumab OR avelumab OR ipilimumab AND Cancer [DISEASE] with filters for and active or recruiting. For trials in combination with NM, on April 22, 2019 we searched [clinicaltrials.gov](http://clinicaltrials.gov) for the [name of stromal normalizing therapy] AND (nab-paclitaxel OR (liposomal AND doxorubicin)) AND Cancer [DISEASE] with filters for and active or recruiting.

**Supplementary table 4. Retrospective studies of inhibitors of the renin—angiotensin—aldosterone (RAS) system in patients with cancer.** This table is updated from a previous review of the senior author (22).

| Type, population                         | Year     | Number of patients    | Combined therapies                         | Outcome control (months)                        | Outcome RAS inhibitor use (months) |
|------------------------------------------|----------|-----------------------|--------------------------------------------|-------------------------------------------------|------------------------------------|
| <i>NSCLC</i>                             |          |                       |                                            |                                                 |                                    |
| Stage IIIB–IV                            | 2009(23) | 287                   | Chemotherapy                               | OS 8.6                                          | 11.7                               |
| Stage IIIA–B                             | 2015(24) | 673                   | RT ± chemotherapy                          | No change in OS                                 |                                    |
| Metastatic                               | 2015(25) | 117                   | Chemotherapy                               | OS 12                                           | 17                                 |
| Stage I–IIIA/Stage IIIB–IV               | 2016(26) | 301                   | Surgery + Chemotherapy or TKIs             | PFS 6.8                                         | 9.2                                |
| Stage IIIB–IV                            | 2016(27) | CP: 1,465<br>CBP: 348 | Chemotherapy ± anti-VEGF (CP± bevacizumab) | CP OS 8.4                                       | 12                                 |
| Advanced-stage                           | 2019(28) | 283                   | Anti-PD-1/PD-L1 antibodies                 | PFS 3.8                                         | 2.5                                |
| <i>Breast cancer</i>                     |          |                       |                                            |                                                 |                                    |
| Stage I–III                              | 2011(29) | 1,413                 | Neoadjuvant chemotherapy                   | No change in OS                                 |                                    |
| Stage I–IIIA                             | 2011(30) | 1,779                 | Curative                                   | Increased recurrence                            |                                    |
| Stage II/III                             | 2011(31) | 703                   | Curative                                   | No change in OS, reduced recurrence             |                                    |
| Stage I–IV                               | 2012(32) | 486                   | Treatment NR                               | No change in OS                                 |                                    |
| Early triple-negative                    | 2013(33) | 800                   | Resection                                  | No change in OS                                 |                                    |
| Stage I–III                              | 2013(34) | 1,449                 | Neoadjuvant chemotherapy                   | No change in OS                                 |                                    |
| Stage I–II                               | 2014(35) | 4,216                 | Resected                                   | Increased risk of second primary breast cancer  |                                    |
| Pathologic N3                            | 2015(36) | 218                   | Resected                                   | No change in OS                                 |                                    |
| Early ER <sup>+</sup> /HER2 <sup>-</sup> | 2016(37) | 671                   | NA                                         | No change in OS                                 |                                    |
| <i>RCC</i>                               |          |                       |                                            |                                                 |                                    |
| Metastatic                               | 2011(38) | 127                   | Sunitinib                                  | PFS 6                                           | 13                                 |
| Metastatic                               | 2014(39) | 278                   | Sunitinib                                  | Higher PFS with RAS inhibitor use               |                                    |
| Metastatic                               | 2015(40) | 4,736                 | Systemic                                   | OS 16.7                                         | 26.7                               |
| Metastatic                               | 2015(41) | 213                   | Sunitinib                                  | Longer OS with RAS inhibitors                   |                                    |
| Non-metastatic                           | 2015(42) | 557                   | Resection                                  | Higher 5-year survival rate with RAS inhibitors |                                    |
| Metastatic                               | 2016(43) | 1,545                 | anti-VEGF/placebo                          | No change in OS                                 |                                    |

| <i>Urinary tract cancer</i>            |          |             |                            |                                                  |                                       |
|----------------------------------------|----------|-------------|----------------------------|--------------------------------------------------|---------------------------------------|
| Localized UTUC                         | 2012(44) | 279         | Resection                  | 5-year MFS<br>72.8%                              | 93.0                                  |
| NMIBC                                  | 2012(45) | 330         | Resection                  | 5-year RFS<br>53.3%                              | 78.4                                  |
| NMIBC                                  | 2015(46) | 340         | Resection                  | 5-year RFS<br>28.1%                              | 45.6                                  |
| Bladder cancer, T1-4, N0/≥1            | 2017(47) | 269         | Resection                  | 5-year OS<br>61.4%                               | 76.1                                  |
| <i>Prostate cancer</i>                 |          |             |                            |                                                  |                                       |
| Local/locally advanced                 | 2016(48) | 558         | RT plus HT                 | Biochemical recurrence<br>38.3%                  | 18.4                                  |
| <i>PDAC</i>                            |          |             |                            |                                                  |                                       |
| Advanced-stage                         | 2010(49) | 155         | Chemotherapy               | OS 9.5                                           | 15.1                                  |
| Advanced-stage                         | 2013(50) | 250         | Chemotherapy               | Longer OS                                        |                                       |
| Advanced-stage                         | 2015(51) | 349         | Chemotherapy               | OS 11.2                                          | 15.6                                  |
| T1-4/N0-1                              | 2015(52) | 164         | Resection                  | No change in OS                                  |                                       |
| Resected, locally advanced, metastatic | 2017(53) | 794         | –                          | OS 19.3                                          | 36.3                                  |
| <i>Oesophageal cancer</i>              |          |             |                            |                                                  |                                       |
| Stage I–IV                             | 2015(54) | 1,174       | CRT +/- resection          | No change in OS                                  |                                       |
| Stage I–III                            | 2015(55) | 141         | Resection                  | OS 58.3                                          | 75.3                                  |
| Advanced-stage                         | 2018(56) | 375         | Chemotherapy               | OS 30                                            | 59                                    |
| <i>Gastric cancer</i>                  |          |             |                            |                                                  |                                       |
| Advanced-stage                         | 2012(57) | 63          | Chemotherapy               | OS 8.2                                           | 13.9                                  |
| <i>Colorectal cancer</i>               |          |             |                            |                                                  |                                       |
| CRC stage II                           | 2007(58) | 55          | Surgery                    | More distant metastasis with less RAS inhibitors |                                       |
| Advanced-stage CRC                     | 2013(59) | 262         | Chemotherapy or RT         | OS 695 days                                      | 1,341 (when combined with β blockers) |
| Metastatic CRC                         | 2015(60) | 181         | Chemotherapy and anti-VEGF | OS 15.2 months                                   | 26.5                                  |
| Rectal cancer                          | 2016(61) | 115;<br>186 | Neoadjuvant (C)RT          | pCR 17%                                          | 52%                                   |
| <i>Hepatobiliary cancer</i>            |          |             |                            |                                                  |                                       |
| HCV-related HCC without cirrhosis and  | 2011(62) | 185;<br>141 | Resection                  | 5-year OS<br>51.6%                               | 76.7                                  |

|                                               |          |                                     |                                          |                               |      |
|-----------------------------------------------|----------|-------------------------------------|------------------------------------------|-------------------------------|------|
| with cirrhosis                                |          |                                     |                                          |                               |      |
| HCC                                           | 2015(63) | 153                                 | RFA-treated                              | OS 48 months                  | 84   |
| Advanced-stage BTC                            | 2016(64) | 287                                 | Chemotherapy                             | No change in OS               |      |
| HCC                                           | 2017(65) | 156;<br>76                          | Sorafenib or experimental therapy or BSC | OS 6.8                        | 11.9 |
| <i>Melanoma</i>                               |          |                                     |                                          |                               |      |
| Nonmetastatic                                 | 2013(66) | 741                                 | Resection                                | No change in OS               |      |
| <i>Glioblastoma</i>                           |          |                                     |                                          |                               |      |
| Supratentorial GBM                            | 2012(67) | 87                                  | RT                                       | Steroid-sparing effect        |      |
| Supratentorial GBM                            | 2015(68) | 81                                  | RT plus temozolomide                     | OS 12.9                       | 16.7 |
| Supratentorial GBM, newly diagnosed           | 2016(69) | 22                                  | –                                        | Less oedema                   |      |
| GBM                                           | 2017(70) | 1,186                               | Chemotherapy and bevacizumab             | OS 56 weeks                   | 99   |
| <i>Haematological malignancies</i>            |          |                                     |                                          |                               |      |
| Multiple myeloma                              | 2005(71) | 168                                 | PBSCT                                    | OS 73.3                       | 38.7 |
| AML                                           | 2014(72) | 1,043                               | Chemotherapy                             | No change in OS               |      |
| <i>Ovarian cancer</i>                         |          |                                     |                                          |                               |      |
| Stage IIIC or IV                              | 2019(73) | 222                                 | Standard of care                         | OS 33 months                  | 63   |
| <i>Studies including several cancer types</i> |          |                                     |                                          |                               |      |
| Lung<br>CRC<br>Breast<br>Prostate             | 2013(74) | 4,241;<br>3,967;<br>4,019;<br>3,355 | –                                        | Shorter OS in breast and lung |      |
| Breast<br>CRC<br>Prostate                     | 2014(75) | 9,814;<br>4,762;<br>6,339           | –                                        | No effect on OS               |      |

AML, acute myeloid leukaemia; BSC, best-supportive care; BTC, biliary tract cancer; CP, carboplatin and paclitaxel; CBP, carboplatin, paclitaxel and bevacizumab; CRC, colorectal cancer; HCC, hepatocellular carcinoma; HCV, hepatitis C virus; NA, not applicable; NR, not reported; NSCLC, non-small-cell lung cancer; NMIBC, nonmuscle-invasive bladder cancer; OS, overall survival; PBSCT, peripheral blood stem cell transplantation; PDAC, pancreatic ductal adenocarcinoma; RAS, renin–angiotensin–aldosterone system; RCC, renal cell carcinoma; RFA, radiofrequency ablation; TKI, tyrosine-kinase inhibitor; UTUC, upper-tract urothelial carcinoma.

## Supplemental References

1. Chauhan VP & Jain RK (2013) Strategies for advancing cancer nanomedicine. *Nat Mater* 12(11):958-962.
2. Northfelt DW, *et al.* (1998) Pegylated-liposomal doxorubicin versus doxorubicin, bleomycin, and vincristine in the treatment of AIDS-related Kaposi's sarcoma: results of a randomized phase III clinical trial. *Journal of clinical oncology* 16(7):2445-2451.
3. Gordon AN, *et al.* (2001) Recurrent epithelial ovarian carcinoma: a randomized phase III study of pegylated liposomal doxorubicin versus topotecan. *Journal of clinical oncology* 19(14):3312-3322.
4. O'Brien ME, *et al.* (2004) Reduced cardiotoxicity and comparable efficacy in a phase III trial of pegylated liposomal doxorubicin HCl (CAELYX™/Doxil®) versus conventional doxorubicin for first-line treatment of metastatic breast cancer. *Annals of oncology* 15(3):440-449.
5. Gradishar W, *et al.* (2005) Phase III trial of nanoparticle albumin-bound paclitaxel compared with polyethylated castor oil-based paclitaxel in women with breast cancer. *Journal of clinical oncology: official journal of the American Society of Clinical Oncology* 23(31):7794.
6. Gradishar WJ, *et al.* (2012) Phase II trial of nab-paclitaxel compared with docetaxel as first-line chemotherapy in patients with metastatic breast cancer: final analysis of overall survival. *Clinical breast cancer* 12(5):313-321.
7. Rugo HS, *et al.* (2015) Randomized phase III trial of paclitaxel once per week compared with nanoparticle albumin-bound nab-paclitaxel once per week or ixabepilone with bevacizumab as first-line chemotherapy for locally recurrent or metastatic breast cancer: CALGB 40502/NCCTG N063H (Alliance). *Journal of Clinical Oncology* 33(21):2361.
8. Untch M, *et al.* (2016) Nab-paclitaxel versus solvent-based paclitaxel in neoadjuvant chemotherapy for early breast cancer (GeparSepto—GBG 69): a randomised, phase 3 trial. *The lancet oncology* 17(3):345-356.
9. Gianni L, *et al.* (2018) Comparing neoadjuvant nab-paclitaxel vs paclitaxel both followed by anthracycline regimens in women with ERBB2/HER2-negative breast cancer—the Evaluating Treatment with Neoadjuvant Abraxane (ETNA) Trial: a randomized phase 3 clinical trial. *JAMA oncology* 4(3):302-308.
10. Socinski MA, *et al.* (2012) Weekly nab-paclitaxel in combination with carboplatin versus solvent-based paclitaxel plus carboplatin as first-line therapy in patients with advanced non-small-cell lung cancer: final results of a phase III trial. *Journal of Clinical Oncology* 30(17):2055-2062.
11. Von Hoff DD, *et al.* (2013) Increased survival in pancreatic cancer with nab-paclitaxel plus gemcitabine. *N Engl J Med* 369(18):1691-1703.
12. Tempero MA, *et al.* (2019) APACT: phase III, multicenter, international, open-label, randomized trial of adjuvant nab-paclitaxel plus gemcitabine (nab-P/G) vs gemcitabine (G) for surgically resected pancreatic adenocarcinoma. (American Society of Clinical Oncology).
13. Socinski MA, *et al.* (2018) Atezolizumab for First-Line Treatment of Metastatic Nonsquamous NSCLC. *New England Journal of Medicine*.

14. Schmid P, *et al.* (2018) Atezolizumab and Nab-Paclitaxel in Advanced Triple-Negative Breast Cancer. *The New England Journal of Medicine* 379:2108-2121.
15. Wang-Gillam A, *et al.* (2015) Nanoliposomal irinotecan with fluorouracil and folinic acid in metastatic pancreatic cancer after previous gemcitabine-based therapy (NAPOLI-1): a global, randomised, open-label, phase 3 trial. *The Lancet* 387(10018):545-557.
16. Bonvalot S, *et al.* (2019) NBTXR3, a first-in-class radioenhancer hafnium oxide nanoparticle, plus radiotherapy versus radiotherapy alone in patients with locally advanced soft-tissue sarcoma (Act. In. Sarc): a multicentre, phase 2–3, randomised, controlled trial. *The Lancet Oncology*.
17. Lancet JE, *et al.* (2016) Final results of a phase III randomized trial of CPX-351 versus 7+ 3 in older patients with newly diagnosed high risk (secondary) AML. (American Society of Clinical Oncology).
18. Murphy JE, *et al.* (2019) A phase II study of neoadjuvant FOLFIRINOX in combination with losartan followed by chemoradiotherapy in locally advanced pancreatic cancer: R0 resection rate and clinical outcomes. *JAMA Oncology* 5(7):1020-1027.
19. Lee EQ, *et al.* (2018) Phase I and biomarker study of plerixafor and bevacizumab in recurrent high-grade glioma. *Clin. Cancer Res.* 24(19):4643-4649.
20. Wang-Gillam A (2019) Targeting Stroma: A Tale of Caution. *Journal of Clinical Oncology* 37(13):1041-1043.
21. Doherty GJ, Tempero M, & Corrie PG (2018) HALO-109–301: a Phase III trial of PEGPH20 (with gemcitabine and nab-paclitaxel) in hyaluronic acid-high stage IV pancreatic cancer. *Future Oncology* 14(1):13-22.
22. Pinter M & Jain RK (2017) Targeting the renin-angiotensin system to improve cancer treatment: Implications for immunotherapy. *Science Translational Medicine* 9(410):eaan5616.
23. Wilop S, *et al.* (2009) Impact of angiotensin I converting enzyme inhibitors and angiotensin II type 1 receptor blockers on survival in patients with advanced non-small-cell lung cancer undergoing first-line platinum-based chemotherapy. *J Cancer Res Clin Oncol* 135(10):1429-1435.
24. Wang H, *et al.* (2015) Incidental receipt of cardiac medications and survival outcomes among patients with stage III non–small-cell lung cancer after definitive radiotherapy. *Clinical lung cancer* 16(2):128-136.
25. Aydiner A, Ciftci R, & Sen F (2015) Renin-Angiotensin system blockers may prolong survival of metastatic non-small cell lung cancer patients receiving erlotinib. *Medicine* 94(22).
26. Miao L, *et al.* (2016) Impact of angiotensin I-converting enzyme inhibitors and angiotensin II type-1 receptor blockers on survival of patients with NSCLC. *Sci. Rep.* 6:21359.
27. Menter AR, *et al.* (2016) Effect of angiotensin system inhibitors on survival in patients receiving chemotherapy for advanced non-small cell lung cancer. *Clinical Lung Cancer*.
28. Medjebbar S, *et al.* (2019) Angiotensin-converting enzyme inhibitor prescription is associated with decreased progression-free survival (PFS) and overall survival (OS) in patients with lung cancers treated with PD-1/PD-L1 immune checkpoint blockers. in *ASCO Annual Meeting*, p e20512.

29. Melhem-Bertrandt A, *et al.* (2011) Beta-blocker use is associated with improved relapse-free survival in patients with triple-negative breast cancer. *Journal of clinical oncology* 29(19):2645.
30. Ganz PA, Habel LA, Weltzien EK, Caan BJ, & Cole SW (2011) Examining the influence of beta blockers and ACE inhibitors on the risk for breast cancer recurrence: results from the LACE cohort. *Breast cancer research and treatment* 129(2):549.
31. Chae YK, *et al.* (2011) Reduced risk of breast cancer recurrence in patients using ACE inhibitors, ARBs, and/or statins. *Cancer investigation* 29(9):585-593.
32. Şendur MA, *et al.* (2012) Efficacy of angiotensin-receptor blockers on demographic and clinico-pathological characteristics of breast cancer. *The Breast* 21(3):419-420.
33. Botteri E, *et al.* (2013) Therapeutic effect of  $\beta$ -blockers in triple-negative breast cancer postmenopausal women. *Breast cancer research and treatment* 140(3):567-575.
34. Chae YK, *et al.* (2013) Use of ACE inhibitors and angiotensin receptor blockers and primary breast cancer outcomes. *Journal of Cancer* 4(7):549.
35. Boudreau DM, *et al.* (2014) Comparative safety of cardiovascular medication use and breast cancer outcomes among women with early stage breast cancer. *Breast cancer research and treatment* 144(2):405-416.
36. Babacan T, *et al.* (2015) The effect of renin-angiotensin-system inhibition on survival and recurrence of N3+ breast cancer patients. *J BUON* 20(1):50-56.
37. Goldvaser H, *et al.* (2016) The Association between Angiotensin Receptor Blocker Usage and Breast Cancer Characteristics. *Oncology* 91(4):217-223.
38. Keizman D, *et al.* (2011) Angiotensin system inhibitors and outcome of sunitinib treatment in patients with metastatic renal cell carcinoma: a retrospective examination. *Eur J Cancer* 47(13):1955-1961.
39. Keizman D, *et al.* (2014) Active smoking may negatively affect response rate, progression-free survival, and overall survival of patients with metastatic renal cell carcinoma treated with sunitinib. *The oncologist* 19(1):51-60.
40. McKay RR, *et al.* (2015) Angiotensin system inhibitors and survival outcomes in patients with metastatic renal cell carcinoma. *Clin. Cancer Res.* 21(11):2471-2479.
41. Izzedine H, Derosa L, Le Teuff G, Albiges L, & Escudier B (2015) Hypertension and angiotensin system inhibitors: impact on outcome in sunitinib-treated patients for metastatic renal cell carcinoma. *Annals of Oncology* 26(6):1128-1133.
42. Miyajima A, *et al.* (2015) Prognostic impact of renin-angiotensin system blockade on renal cell carcinoma after surgery. *Annals of surgical oncology* 22(11):3751-3759.
43. Sorich MJ, Kichenadasse G, Rowland A, Woodman RJ, & Mangoni AA (2016) Angiotensin system inhibitors and survival in patients with metastatic renal cell carcinoma treated with VEGF - targeted therapy: A pooled secondary analysis of clinical trials. *International journal of cancer* 138(9):2293-2299.
44. Tanaka N, *et al.* (2012) Prognostic impact of renin-angiotensin system blockade in localised upper-tract urothelial carcinoma. *British journal of cancer* 106(2):290.
45. Yuge K, *et al.* (2012) Prognostic value of renin-angiotensin system blockade in non-muscle-invasive bladder cancer. *Annals of surgical oncology* 19(12):3987-3993.
46. Blute Jr ML, *et al.* (2015) Renin-angiotensin inhibitors decrease recurrence after transurethral resection of bladder tumor in patients with nonmuscle invasive bladder cancer. *The Journal of urology* 194(5):1214-1219.



47. Yoshida T, *et al.* (2017) Prognostic impact of renin-angiotensin inhibitors in patients with bladder cancer undergoing radical cystectomy. *Annals of surgical oncology* 24(3):823-831.
48. Alashkham A, *et al.* (2016) The incidence and risk of biochemical recurrence following radical radiotherapy for prostate cancer in men on angiotensin-converting enzyme inhibitors (ACEIs) or angiotensin receptor blockers (ARBs). *Clinical genitourinary cancer* 14(5):398-405.
49. Nakai Y, *et al.* (2010) Inhibition of renin-angiotensin system affects prognosis of advanced pancreatic cancer receiving gemcitabine. *Br. J. Cancer* 103(11):1644-1648.
50. Nakai Y, *et al.* (2013) Clinical outcomes of chemotherapy for diabetic and nondiabetic patients with pancreatic cancer: better prognosis with statin use in diabetic patients. *Pancreas* 42(2):202-208.
51. Nakai Y, *et al.* (2015) The inhibition of renin-angiotensin system in advanced pancreatic cancer: an exploratory analysis in 349 patients. *J Cancer Res Clin Oncol* 141(5):933-939.
52. Tingle SJ, Moir JA, & White SA (2015) Role of anti-stromal polypharmacy in increasing survival after pancreaticoduodenectomy for pancreatic ductal adenocarcinoma. *World journal of gastrointestinal pathophysiology* 6(4):235.
53. Liu H, *et al.* (2017) Use of angiotensin system inhibitors is associated with immune activation and longer survival in nonmetastatic pancreatic ductal adenocarcinoma. *Clin. Cancer Res.* 23(19):5959-5969.
54. He L-R, *et al.* (2015) Impact of comorbidities and use of common medications on cancer and non-cancer specific survival in esophageal carcinoma. *BMC cancer* 15(1):111.
55. Chen Y-H, *et al.* (2015) Prognostic impact of renin-angiotensin system blockade in esophageal squamous cell carcinoma. *Journal of the Renin-Angiotensin-Aldosterone System* 16(4):1185-1192.
56. Geller A, *et al.* (2018) Angiotensin system inhibitors during induction chemotherapy for esophageal adenocarcinoma: Analysis of survival. (American Society of Clinical Oncology).
57. Kim ST, *et al.* (2012) How does inhibition of the renin-angiotensin system affect the prognosis of advanced gastric cancer patients receiving platinum-based chemotherapy? *Oncology* 83(6):354-360.
58. Heinzerling JH, Anthony T, Livingston EH, & Huerta S (2007) Predictors of distant metastasis and mortality in patients with stage II colorectal cancer. *The American surgeon* 73(3):230-238.
59. Engineer DR, Burney BO, Hayes TG, & Garcia JM (2013) Exposure to ACEI/ARB and  $\beta$ -blockers is associated with improved survival and decreased tumor progression and hospitalizations in patients with advanced colon cancer. *Translational oncology* 6(5):539-545.
60. Osumi H, *et al.* (2015) Angiotensin II type-1 receptor blockers enhance the effects of bevacizumab-based chemotherapy in metastatic colorectal cancer patients. *Molecular and clinical oncology* 3(6):1295-1300.
61. Morris ZS, *et al.* (2016) Increased tumor response to neoadjuvant therapy among rectal cancer patients taking angiotensin - converting enzyme inhibitors or angiotensin receptor blockers. *Cancer* 122(16):2487-2495.

62. Kaibori M, *et al.* (2011) Evaluation of metabolic factors on the prognosis of patients undergoing resection of hepatocellular carcinoma. *Journal of gastroenterology and hepatology* 26(3):536-543.
63. Facciorusso A, *et al.* (2015) Angiotensin receptor blockers improve survival outcomes after radiofrequency ablation in hepatocarcinoma patients. *Journal of gastroenterology and hepatology* 30(11):1643-1650.
64. Nakai Y, *et al.* (2016) No survival benefit from the inhibition of renin–angiotensin system in biliary tract cancer. *Anticancer research* 36(9):4965-4970.
65. Pinter M, *et al.* (2017) Use of inhibitors of the renin–angiotensin system is associated with longer survival in patients with hepatocellular carcinoma. *United European Gastroenterology Journal* 5(7):987-996.
66. De Giorgi V, *et al.* (2013) Effect of  $\beta$ -blockers and other antihypertensive drugs on the risk of melanoma recurrence and death. *Mayo Clinic Proceedings*, (Elsevier), pp 1196-1203.
67. Carpentier A, *et al.* (2012) Steroid - sparing effects of angiotensin - II inhibitors in glioblastoma patients. *European journal of neurology* 19(10):1337-1342.
68. Januel E, *et al.* (2015) Impact of renin - angiotensin system blockade on clinical outcome in glioblastoma. *European journal of neurology* 22(9):1304-1309.
69. Kourilsky A, *et al.* (2016) Impact of Angiotensin-II receptor blockers on vasogenic edema in glioblastoma patients. *Journal of neurology* 263(3):524-530.
70. Levin VA, Chan J, Datta M, Yee JL, & Jain RK (2017) Effect of angiotensin system inhibitors on survival in newly diagnosed glioma patients and recurrent glioblastoma patients receiving chemotherapy and/or bevacizumab. *Journal of neuro-oncology* 134(2):325-330.
71. Buchler T, *et al.* (2005) Outcome of patients with multiple myeloma and hypertension treated with angiotensin-I-converting enzyme inhibitors during high-dose chemotherapy. *The Hematology Journal* 5(7):559-564.
72. Chae YK, Dimou A, Pierce S, Kantarjian H, & Andreeff M (2014) The effect of calcium channel blockers on the outcome of acute myeloid leukemia. *Leukemia & lymphoma* 55(12):2822-2829.
73. Zhao Y, *et al.* (2019) Losartan treatment enhances chemotherapy efficacy and reduces ascites in ovarian cancer models by normalizing the tumor stroma. *Proc. Natl. Acad. Sci. U. S. A.* 116(6):2210-2219.
74. Holmes S, Griffith EJ, Musto G, & Minuk GY (2013) Antihypertensive medications and survival in patients with cancer: a population-based retrospective cohort study. *Cancer epidemiology* 37(6):881-885.
75. Cardwell CR, *et al.* (2014) Drugs affecting the renin-angiotensin system and survival from cancer: a population based study of breast, colorectal and prostate cancer patient cohorts. *BMC medicine* 12(1):28.
